# Supplementary material
Source: PubMed Central journal article supplement (PMC3215046)
Supplement: 1107780108_sapp.pdf [file 1107780108_sapp.pdf]

**Supporting Information for:**

**An ATP-binding cassette transporter-like complex governs cell wall hydrolysis at the bacterial cytokinetic ring**

Desirée C. Yang<sup>1</sup>, Nick T. Peters<sup>1†</sup>, Katherine R. Parzych<sup>1†</sup>, Tsuyoshi Uehara<sup>1</sup>, Monica Markovski<sup>1</sup>, and Thomas G. Bernhardt<sup>1\*</sup>

<sup>1</sup>Department of Microbiology and Immunobiology  
Harvard Medical School  
Boston, MA 02115

†These authors contributed equally to this work.

\*To whom correspondence should be addressed.

Thomas G. Bernhardt, Ph.D.  
Harvard Medical School  
Department of Microbiology and Immunobiology  
Armenise Building, Room 302A  
200 Longwood Avenue  
Boston, Massachusetts 02115  
Phone: (617) 432-6971  
Fax: (617) 738-7664  
e-mail: [thomas\\_bernhardt@hms.harvard.edu](mailto:thomas_bernhardt@hms.harvard.edu)

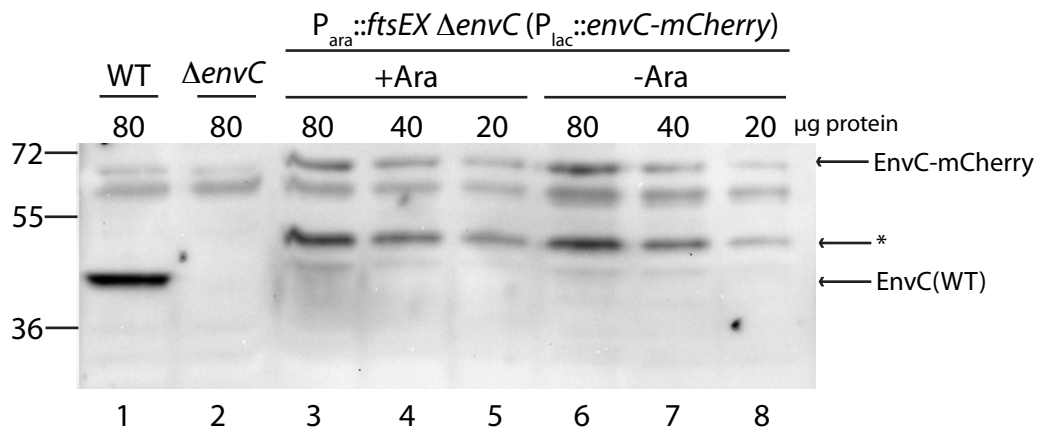

Figure S1

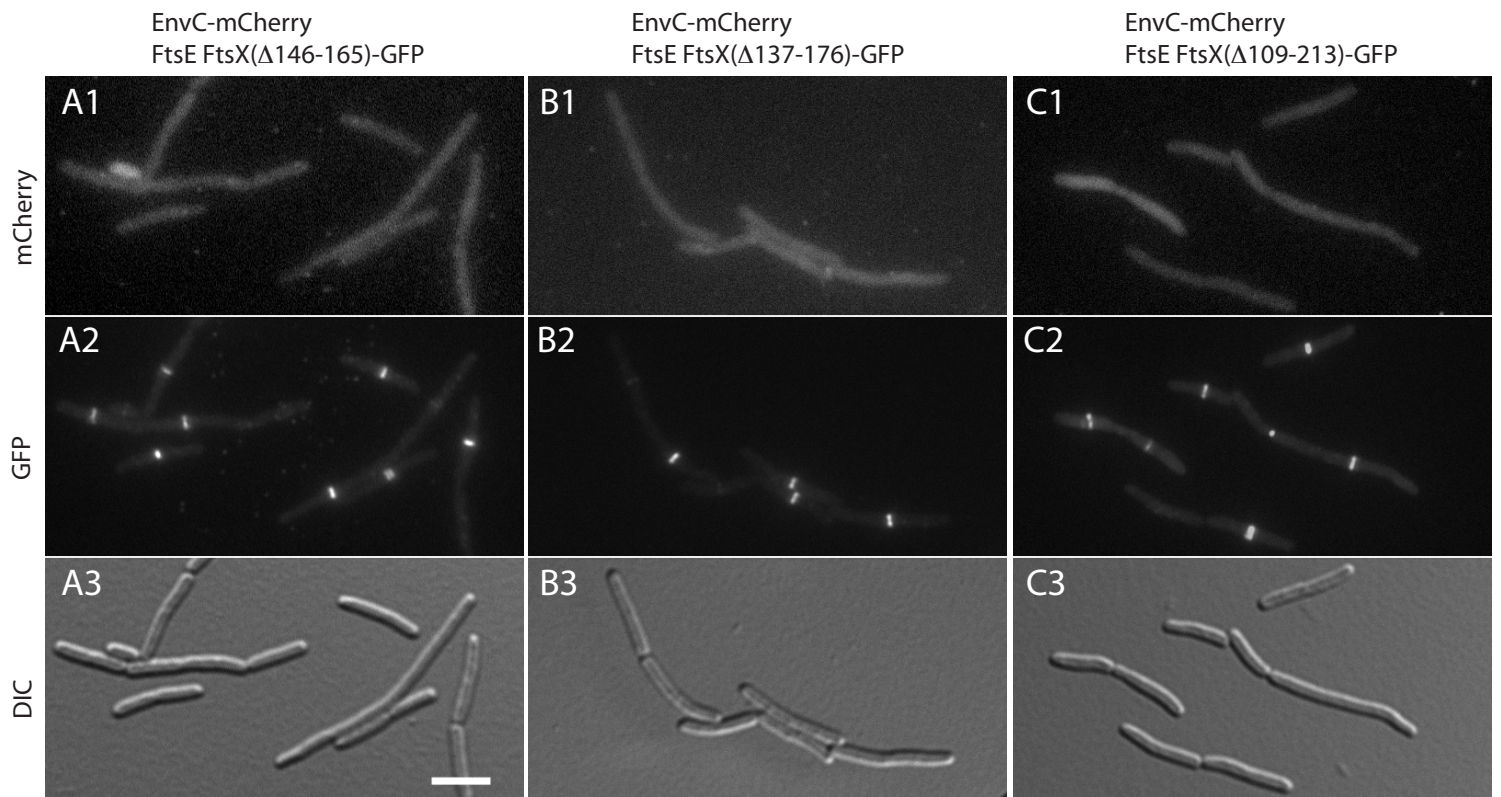

Figure S2

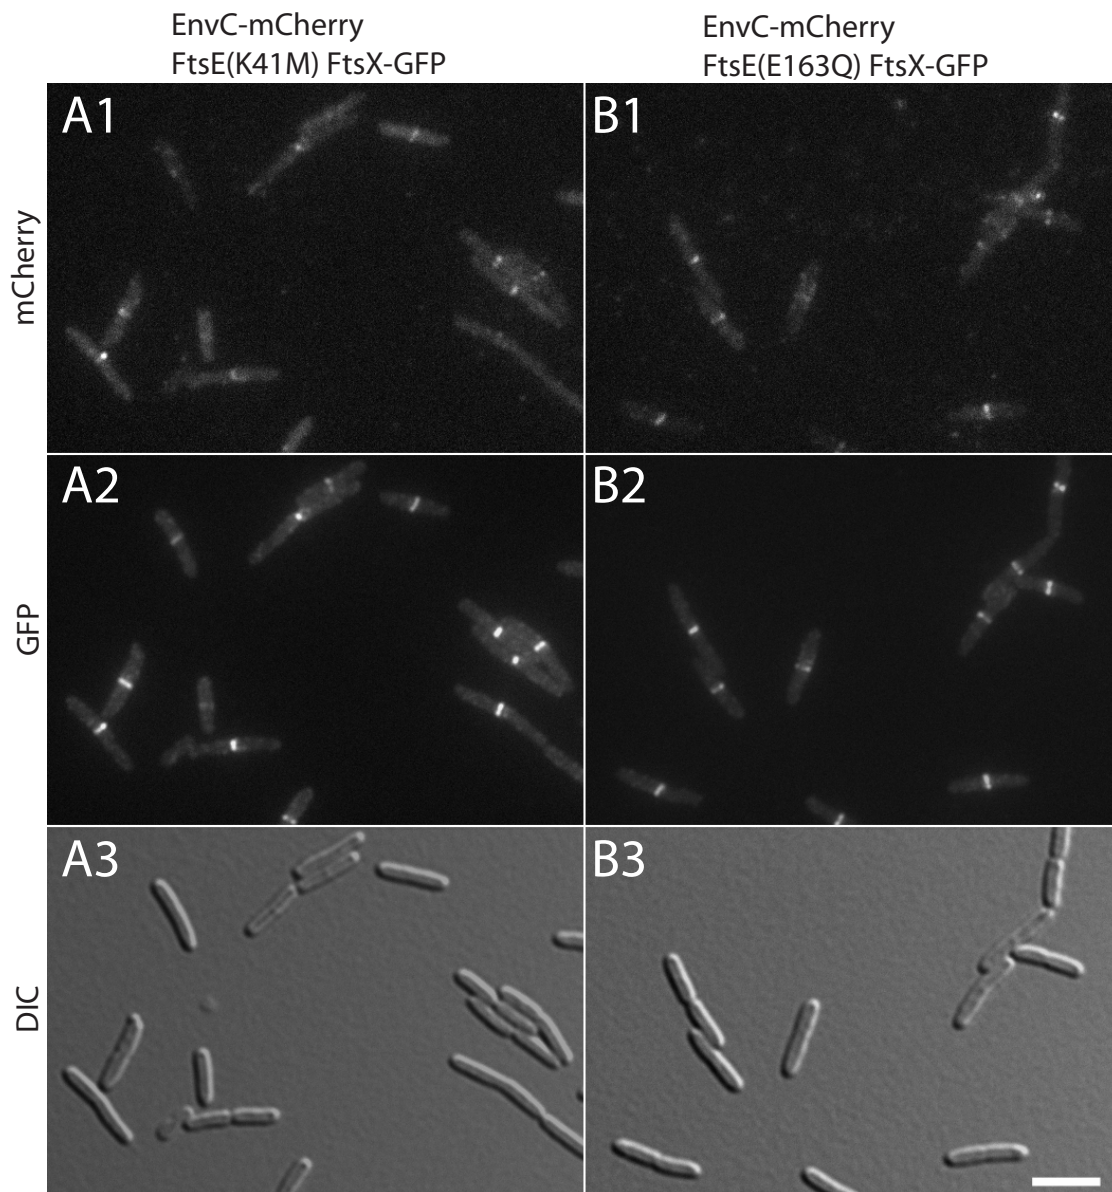

Figure S3

## Figure Legends

**Figure S1. EnvC-mCherry accumulation in FtsEX<sup>+</sup> and FtsEX<sup>-</sup> cells.** Cells of TB28 [WT], TB140 [ $\Delta envC$ ], and NP69(att $\lambda$ TU188)(attHKTB316) [ $\Delta ftsEX \Delta envC zapA-gfp$  ( $P_{ara}::ftsEX$ ) ( $P_{lac}::envC-mCherry$ )] were grown as described in the legend for Figure 5. When the cultures reached an OD<sub>600</sub> of 0.4-0.6, cells were harvested for whole-cell extract preparation. Proteins in the resulting extracts were separated by SDS-PAGE, transferred to PVDF, and EnvC was detected with affinity purified anti-EnvC antibodies. Relevant genotypes and growth conditions are indicated above the corresponding lanes as well as the amount of total protein ( $\mu$ g) loaded per lane. Asterisk indicates an EnvC-mCherry breakdown product observed in both FtsEX<sup>+</sup> and FtsEX<sup>-</sup> cells.

**Figure S2. EnvC localization in cells producing Loop1 FtsX deletions.** Cells of DY18 (att $\lambda$ TD80) [ $\Delta ftsEX \Delta envC$  ( $P_{lac}::envC-mCherry$ )] harboring the integrated expression constructs (attHKDY162) [ $P_{lac}::ftsEX^{\Delta 146-165}-GFP$ ] (A), (attHKDY163) [ $P_{lac}::ftsEX^{\Delta 137-176}-GFP$ ] (B), or (attHKDY165) [ $P_{lac}::ftsEX^{\Delta 109-213}-GFP$ ] (C) were grown and visualized as described in the legend for **Figure 7**.

**Figure S3. EnvC localization in cells producing FtsE\* variants.** Cells of DY18(att $\lambda$ TD80) [ $\Delta ftsEX \Delta envC$  ( $P_{lac}::envC-mCherry$ )] harboring the integrated expression constructs (attHKDY166) [ $P_{lac}::ftsE(K41M)X-GFP$ ] (A) or (attHKDY168) [ $P_{lac}::ftsE(E163Q)X-GFP$ ] (B) were grown and visualized as described in the legend for **Figure 7**.

**Table S1. Cell separation phenotypes of FtsE\* NlpD<sup>-</sup> cells.**

| strain              | genotype                                                              | #cells <sup>a</sup> | # cell units <sup>b</sup> | total L (μm) <sup>c</sup> | avg. L (μm) <sup>c</sup> | total septa | L/septum | septa/cell |
|---------------------|-----------------------------------------------------------------------|---------------------|---------------------------|---------------------------|--------------------------|-------------|----------|------------|
| KP7                 | <i>ΔftsEX ΔnlpD</i>                                                   | 4                   | 225                       | 388                       | 97                       | 218         | 1.8      | 55         |
| KP7<br>(attHKDY156) | <i>ΔftsEX ΔnlpD</i><br>(P <sub>lac</sub> :: <i>ftsEX-GFP</i> )        | 144                 | 200                       | 475                       | 3.3                      | 56          | 8.5      | 0.4        |
| KP7<br>(attHKDY166) | <i>ΔftsEX ΔnlpD</i><br>(P <sub>lac</sub> :: <i>ftsE(K41M)X-GFP</i> )  | 31                  | 202                       | 491                       | 15.8                     | 171         | 2.9      | 6          |
| KP7<br>(attHKDY167) | <i>ΔftsEX ΔnlpD</i><br>(P <sub>lac</sub> :: <i>ftsE(D162N)X-GFP</i> ) | 9                   | 214                       | 434                       | 48.2                     | 208         | 2.1      | 23         |
| KP7<br>(attHKDY168) | <i>ΔftsEX ΔnlpD</i><br>(P <sub>lac</sub> :: <i>ftsE(E163Q)X-GFP</i> ) | 74                  | 200                       | 618                       | 8                        | 127         | 4.9      | 2          |

<sup>a</sup>Cell chains were considered as a single cell regardless of the number of segments they contained.

<sup>b</sup>Indicates the number of cell compartments in chaining cells.

<sup>c</sup>Length measurements represent a minimum because many of the cell chains extended beyond the field of view.

**Table S2. Length and localization measurements of FtsE\* cells producing FtsX-GFP and EnvC-mCherry.**

| Strain                                       | genotype                                                                                                                                | #cells | total L ( $\mu\text{m}$ ) | avg. L ( $\mu\text{m}$ ) | # of FtsX-rings | # of EnvC-rings | % co-localization of FtsX and EnvC* | L/FtsX-ring ( $\mu\text{m}$ ) | L/EnvC-ring ( $\mu\text{m}$ ) | L/septum ( $\mu\text{m}$ ) |
|----------------------------------------------|-----------------------------------------------------------------------------------------------------------------------------------------|--------|---------------------------|--------------------------|-----------------|-----------------|-------------------------------------|-------------------------------|-------------------------------|----------------------------|
| DY18<br>(attHKDY156)<br>(att $\lambda$ TD80) | $\Delta\text{ftsEX } \Delta\text{envC}$<br>(P <sub>lac</sub> :: <i>ftsEX-GFP</i> )<br>(P <sub>lac</sub> :: <i>envC-mCherry</i> )        | 125    | 457                       | 3.7                      | 115             | 93              | 81                                  | 4.0                           | 4.9                           | 9.3                        |
| DY18<br>(attHKDY166)<br>(att $\lambda$ TD80) | $\Delta\text{ftsEX } \Delta\text{envC}$<br>(P <sub>lac</sub> :: <i>ftsE(K41M)X-GFP</i> )<br>(P <sub>lac</sub> :: <i>envC-mCherry</i> )  | 125    | 692                       | 5.5                      | 124             | 95              | 77                                  | 5.5                           | 9.0                           | 13.6                       |
| DY18<br>(attHKDY167)<br>(att $\lambda$ TD80) | $\Delta\text{ftsEX } \Delta\text{envC}$<br>(P <sub>lac</sub> :: <i>ftsE(D162N)X-GFP</i> )<br>(P <sub>lac</sub> :: <i>envC-mCherry</i> ) | 125    | 1096                      | 8.8                      | 131             | 109             | 83                                  | 8.4                           | 13.2                          | 12.2                       |
| DY18<br>(attHKDY168)<br>(att $\lambda$ TD80) | $\Delta\text{ftsEX } \Delta\text{envC}$<br>(P <sub>lac</sub> :: <i>ftsE(E163Q)X-GFP</i> )<br>(P <sub>lac</sub> :: <i>envC-mCherry</i> ) | 125    | 655                       | 5.2                      | 124             | 91              | 73                                  | 7.2                           | 9.0                           | 12.1                       |

\*Reflects the number of FtsX-GFP rings clearly associated with a ring of EnvC-mCherry.

**Table S3. Bacterial strains used in this study.**

| Strain <sup>a</sup> | Genotype <sup>b</sup>                                                                                       | Source/Reference <sup>c</sup>          |
|---------------------|-------------------------------------------------------------------------------------------------------------|----------------------------------------|
| DH5α                | <i>F<sup>-</sup> hsdR17 deoR recA1 endA1 phoA supE44 thi-1 gyrA96 relA1 Δ(lacZYA-argF)U169 φ80dlacZΔM15</i> | Gibco BRL                              |
| BL21(λDE3)          | <i>ompT rB<sup>-</sup> mB<sup>-</sup> (P<sub>lac</sub>UV5::T7gene1)</i>                                     | Novagen                                |
| BTH101              | <i>F<sup>-</sup>, glnV44(AS), recA1, endA1, gyrA96, thi1, hsdR17, spoT1, rfbD1 cya</i>                      | (20)                                   |
| BW25113             | <i>Δ(araD-araB)567 ΔlacZ4787(::rrnB-3) rph-1 Δ(rhaD-rhaB)568 hsdR514</i>                                    | (13)                                   |
| JW5646              | BW25113 <i>ΔenvC::Kan<sup>R</sup></i>                                                                       | (13)                                   |
| JW2985              | BW25113 <i>ΔftsP(sufI)::Kan<sup>R</sup></i>                                                                 | (13)                                   |
| MG1655              | <i>rph1 ilvG rfb-50</i>                                                                                     | (2)                                    |
| MM9                 | TB28 ( <i>Kan<sup>R</sup> araC P<sub>ara</sub>::ponB</i> )                                                  | (5)                                    |
| MM11                | TB28 ( <i>frt araC P<sub>ara</sub>::ponB</i> )                                                              | (5)                                    |
| TB10                | <i>rph1 ilvG rfb-50 λΔcro-bio nad::Tn10</i>                                                                 | (21)                                   |
| TB28                | MG1655 <i>ΔlacZYA::frt</i>                                                                                  | (16)                                   |
| TB140               | TB28 <i>ΔenvC::frt</i>                                                                                      | (7)                                    |
| TB145               | TB28 <i>ΔnlpD747::frt</i>                                                                                   | (7)                                    |
| TB172               | TB28 <i>ΔamiA::frt ΔamiB::frt (Kan<sup>R</sup> araC P<sub>ara</sub>::ponB</i> )                             | P1(MM9) x TU207                        |
| TU122               | TB28 <i>ΔponB::frt</i>                                                                                      | (5)                                    |
| TU189               | TB10 <i>ΔftsEX::Kan<sup>R</sup></i>                                                                         | λRec                                   |
| TU190**             | TB28 <i>ΔftsEX::Kan<sup>R</sup></i>                                                                         | P1(TU189) x TB28( <i>attλTU188</i> )   |
| TU191               | TB28 <i>ΔftsEX::frt</i>                                                                                     | TU190/pCP20                            |
| TU195**             | TB28 <i>ΔftsEX::frt ΔenvC::Kan<sup>R</sup></i>                                                              | P1(JW5646) x TU191( <i>attλTU188</i> ) |
| TU196**             | TB28 <i>ΔftsEX::frt ΔftsP(sufI)::Kan<sup>R</sup></i>                                                        | P1(JW2985) x TU191( <i>attλTU188</i> ) |
| TU205***            | TB28 <i>ΔenvC::frt ΔftsP(sufI)::Kan<sup>R</sup></i>                                                         | P1(JW2985) x TB140( <i>attλTD25</i> )  |
| TU207               | TB28 <i>ΔamiA::frt ΔamiB::frt</i>                                                                           | (12)                                   |
| HC260               | TB10 <i>zapA-gfp Cam<sup>R</sup></i>                                                                        | λRec                                   |
| HC261               | TB28 <i>zapA-gfp Cam<sup>R</sup></i>                                                                        | P1(HC260) x TB28                       |
| HC262               | TB28 <i>ΔenvC::frt zapA-gfp Cam<sup>R</sup></i>                                                             | P1(HC261) x TB140                      |



|       |                                                                                |                          |
|-------|--------------------------------------------------------------------------------|--------------------------|
| NP32  | TB28 $\Delta envC::frit zapA-gfp frit$                                         | HC262/pCP20              |
| NP65* | TB28 ( <i>frit araC</i> P <sub>ara</sub> ):: <i>ponB</i> $\Delta envC::Kan^R$  | P1(JW5646) x MM11/pTB63  |
| NP66* | TB28 ( <i>frit araC</i> P <sub>ara</sub> ):: <i>ponB</i> $\Delta ftsEX::Kan^R$ | P1(TU190) x MM11/pTB63   |
| NP69  | TB28 $\Delta envC::frit zapA-gfp frit \Delta ftsEX::Kan^R$                     | P1(TU190) x NP32         |
| KP4*  | TB28 $\Delta envC::Kan^R$                                                      | P1(JW5646) x TB28/pTB63  |
| KP5*  | TB28 $\Delta ftsEX::Kan^R$                                                     | P1(TU190) x TB28/pTB63   |
| KP6*  | TB28 $\Delta nlpD747::frit \Delta envC::Kan^R$                                 | P1(JW5646) x TB145/pTB63 |
| KP7*  | TB28 $\Delta nlpD747::frit \Delta ftsEX::Kan^R$                                | P1(TU190) x TB145/pTB63  |
| DY18  | TB28 $\Delta envC::frit \Delta ftsEX::Kan^R$                                   | P1(TU190) x TB140        |

<sup>a</sup> Stains marked with a single asterisk were made by transducing Kan<sup>R</sup> cassettes into a recipient harboring plasmid pTB63. Stains marked with a double or triple asterisk were made by transducing Kan<sup>R</sup> cassettes into recipients harboring attλTU188 or attλTD25, respectively.

<sup>b</sup> The Kan<sup>R</sup> cassette is flanked by *frit* sites for removal by FLP recombinase. An *frit* scar remains following removal of the cassette using FLP expressed from pCP20.

<sup>c</sup> Strain constructions by P1 transduction are described using the shorthand: P1(donor) x recipient. Transductants were selected on LB Kan or Cam plates where appropriate. Strains resulting from the removal of a Drug<sup>R</sup> cassette using pCP20 are indicated as: Parental strain/pCP20. λRec indicates strains were constructed by recombineering (see Experimental Procedures for details).

**Table S4. Plasmids used in this study<sup>a</sup>.**

| Plasmid | Genotype                                                              | Origin    | Source or reference |
|---------|-----------------------------------------------------------------------|-----------|---------------------|
| pCP20   | <i>bla cat cl875 repA(Ts) P<sub>R</sub>::flp</i>                      | pSC101    | (15)                |
| pInt-ts | <i>bla cl875 repA(Ts) P<sub>R</sub>::int<sup>Δ</sup></i>              | pSC101    | (3)                 |
| pKNT25  | <i>aph Plac::T25</i>                                                  | p15A      | (20)                |
| pCH363  | <i>bla lacI<sup>q</sup> P<sub>lac</sub>::T18</i>                      | pBR/colE1 | (8)                 |
| pDY133  | <i>bla lacI<sup>q</sup> P<sub>T7</sub>::<sup>10H-loop1</sup>ftsX</i>  | pBR/colE1 | This study          |
| pDY138  | <i>bla lacI<sup>q</sup> P<sub>lac</sub>::<sup>loop1</sup>ftsX-T18</i> | pBR/colE1 | This study          |
| pDY151  | <i>bla lacI<sup>q</sup> P<sub>T7</sub>::H-SUMO-envC(35-276)</i>       | pBR/colE1 | This study          |
| pDY156  | <i>attHK bla P<sub>lac</sub>::ftsEX-GFP</i>                           | R6K       | This study          |
| pDY161  | <i>attHK bla P<sub>lac</sub>::ftsEX(<sup>Δ152-161</sup>)-GFP</i>      | R6K       | This study          |
| pDY162  | <i>attHK bla P<sub>lac</sub>::ftsEX(<sup>Δ146-165</sup>)-GFP</i>      | R6K       | This study          |
| pDY163  | <i>attHK bla P<sub>lac</sub>::ftsEX(<sup>Δ137-176</sup>)-GFP</i>      | R6K       | This study          |
| pDY164  | <i>attHK bla P<sub>lac</sub>::ftsEX(<sup>Δ109-188</sup>)-GFP</i>      | R6K       | This study          |
| pDY165  | <i>attHK bla P<sub>lac</sub>::ftsEX(<sup>Δ109-213</sup>)-GFP</i>      | R6K       | This study          |
| pDY166  | <i>attHK bla P<sub>lac</sub>::ftsE(K41M)X-GFP</i>                     | R6K       | This study          |
| pDY167  | <i>attHK bla P<sub>lac</sub>::ftsE(D162N)X-GFP</i>                    | R6K       | This study          |
| pDY168  | <i>attHK bla P<sub>lac</sub>::ftsE(E163Q)X-GFP</i>                    | R6K       | This study          |
| pTB63   | <i>tetAR ftsQAZ</i>                                                   | pSC101    | (16)                |
| pTB102  | <i>cat cl875 repA(Ts) P<sub>R</sub>::int<sup>HK022</sup></i>          | pSC101    | (4)                 |
| pTB316  | <i>attHK022 bla lacI<sup>q</sup> P<sub>lac</sub>::envC-mCherry</i>    | R6K       | (7)                 |
| pTB332  | <i>aph P<sub>lac</sub>::envC(277-419)-T25</i>                         | p15A      | This study          |
| pTB333  | <i>aph P<sub>lac</sub>::envC(34-419)-T25</i>                          | p15A      | This study          |
| pTD25   | <i>attλ cat P<sub>ara</sub>::envC</i>                                 | R6K       | (7)                 |
| pTD80   | <i>attλ cat P<sub>lac</sub>::envC-mCherry</i>                         | R6K       | This study          |
| pTU110  | <i>cat lacI<sup>q</sup> P<sub>lac</sub>::ponB lacZ</i>                | F         | (5)                 |
| pTU188  | <i>attλ cat P<sub>ara</sub>::ftsEX</i>                                | R6K       | This study          |

<sup>a</sup> P<sub>R</sub>, P<sub>lac</sub>, and P<sub>ara</sub> indicate the phage λR, lactose, and arabinose promoters, respectively. P<sub>syn135</sub> is a synthetic *lac* promoter with a consensus -35 element and no operators. Numbers in parenthesis indicate the codons included in the relevant clones. The GFP allele used in plasmid constructs was superfolder GFP (22) and mCherry was

from Shaner and co-workers (23). The linker LEGPAGL was present between the fusion proteins and the protein of interest.

## Supporting Methods and Materials

### Media, bacterial strains, and plasmids

Cells were grown in LB [1% tryptone, 0.5% yeast extract, (0.5%-1.5% NaCl as indicated)] or minimal M9 medium (1) supplemented with 0.2% casamino acids and 0.2% sugar (glucose, maltose, or arabinose as indicated). Unless otherwise indicated, antibiotics were used at 5, 10, 15, 20, or 50  $\mu\text{g/ml}$  for tetracycline (Tet), chloramphenicol (Cam), ampicillin (Amp), kanamycin (Kan), or spectinomycin (Spec), respectively.

The bacterial strains used in this study are listed in Table S1. All strains used in the reported experiments are derivatives of MG1655 (2). Plasmids used in this study are listed in Table S2. Vectors with R6K origins are all derivatives of the CRIM plasmids developed by Wanner and co-workers (3). They were either maintained in the cloning strain DH5 $\alpha$ ( $\lambda$ *pir*) where they replicate as plasmids, or they were integrated into phage attachment sites (HK022 or  $\lambda$ ) using the helper vectors pTB102 (4) or pInt-ts (3), respectively, as described previously (3). Single copy integrants were identified using diagnostic PCR (3). Integrated vectors were transferred between strains by P1-mediated transduction. In all cases, PCR was performed using KOD polymerase (Novagen) according to the instructions. Unless otherwise indicated, MG1655 chromosomal DNA was used as a template. Restriction sites for use in plasmid constructions are italicized and underlined in the primer sequences given below. Plasmid DNA and PCR fragments were purified using the Qiaprep spin miniprep kit (Qiagen) or the Qiaquick PCR purification kit (Qiagen), respectively.

### pTU188

To construct pTU188 [*attλ cat P<sub>ara</sub>::ftsE-ftsX*], a fragment containing *ftsE* and *ftsX* was amplified with the primers 5'-GTCATCTAGATTTGCCCGAGAGGATTAACAATG-3' and 5'-GTCAAAAGCTTTTATTATTCAGGCGTAAAGTGGCG-3', digested with XbaI and HindIII, and inserted into the corresponding XbaI-HindIII sites of pTB285 (5).

### pTB332-333

For pTB332 [*aph Plac::envC(277-419)-T25*], *envC(278-419)* was amplified with the primers 5'-GTACAAAGCTTGACCGAAAGCGAAAAATCGCTGATG-3' and 5'-GTCAGGATCCTCTCTTCCCAACCACGGCTGTGG-3'. The resulting fragment was digested and ligated with HindIII and BamHI digested pKNT25 (6). pTB333 [*aph Plac::envC(34-419)-T25*] was constructed in the same manner except that *envC(34-419)* was amplified with the primers 5'-GTACAAAGCTTGGATGAGCGTGACCAACTCAAATCTATTC-3' and 5'-GTCAGGATCCTCTCTTCCCAACCACGGCTGTGG-3'.

### pTD80

To construct pTD80 [*attλ cat lacI<sup>q</sup> P<sub>lac</sub>::envC-mCherry*], the *P<sub>lac</sub>::envC-mCherry* containing EcoRI-HindIII fragment of pTB316 [*attHK022 bla lacI<sup>q</sup> P<sub>lac</sub>::envC-mCherry*] (7) was used to replace the corresponding *P<sub>ara</sub>::envC* fragment of pTD25 [*attλ cat P<sub>ara</sub>::envC*] (7).

### pMT1

pMT1 [*cat P<sub>ara</sub>::ftsEX*] was constructed in multiple steps. First, pTU170 [*attHK022 bla P<sub>syn135</sub>::gfp-zapA*] was made by ligating the *EcoRI-SalI* digested fragment from pEZ4 (8) into

the *EcoRI-SalI* digested backbone of pTB263 [*attHK022 bla P<sub>lac</sub>::<sup>ss</sup>dsbA-sfgfp*] (7). Then pTU176 [*attHK022 bla P<sub>syn135</sub>::<sup>ss</sup>dsbA-sfgfp*] was made by ligating the *ssdsbA-sfgfp*-containing *XbaI-HindIII* fragment from pTB263 (7) with *XbaI-HindIII* digested pTU170 to generate pTU176. The *ssdsbA-sfgfp*-containing *XbaI-HindIII* fragment from pTU176 was ligated with *XbaI-HindIII* digested pBAD18-cat (9) to generate pTU214 [*cat P<sub>ara</sub>::<sup>ss</sup>dsbA-sfgfp*]. Using pTU188 [*attλ cat P<sub>ara</sub>::ftsEX*] as a template, *RBSwk2-ftsEX* was amplified with primers 5'-GTCATCTAGAAAAAAGGAAAAATGATTCGCTTTGAACATGTCAGCAAGG-3' and 5'-GTCAAAGCTTTTATTATTCAGGCGTAAAGTGGCG-3'. The resulting fragment was digested with *HindIII* and *XbaI* and ligated with pTU214 digested with the same enzymes to generate pMT1.

### pDY133

pDY133 [*bla P<sub>lac</sub>::<sup>loop1</sup>ftsX-T18*] was constructed in two steps. First, the *amiA* gene was amplified using the primers 5'-GTCATCTAGAAGGATCCGCCAAAGACGAACTTTTAAAAACCAGC-3' and 5'-GTCAGAGCTCGGCTCGAGTCGCTTTTTCGAATGTGCTTTCTGGTTG-3'. The resulting fragment was digested with *XbaI* and *SacI* and ligated with pCH363 [*bla P<sub>lac</sub>::lacZ-T18*] (8) digested with the same enzymes to generate pTU236 [*bla P<sub>lac</sub>::amiA-T18*]. Second, *loop1ftsX* was amplified from pMT1 [*cat P<sub>ara</sub>::RBSwk2-ftsEX*] using the primers 5'-GTCATTGGATCCGTGTACAAAAACGTTAACCAGGCGGCG-3' and 5'-AGTTAAGCTTATTACTCGAGGCGCCCGACCAGCCCGGTCAACGCC-3'. The resulting fragment was digested with *BamHI* and *XhoI* and ligated with pTU236 [*bla P<sub>lac</sub>::amiA-T18*] digested with the same enzymes to generate pDY133.



the same enzymes. Using pTB138 as a template, <sup>cc</sup>*envC* was amplified with the primers 5'-GTCAGGATCCGGTGATGAGCGTGACCAACTCAAATCTATTC-3' and 5'-GTCACTCGAGCGGTTTGTAGGTGGTGCCTTTGC-3'. The resulting fragment was digested with *Bam*HI and *Xho*I and ligated with pTB282 (11) digested with the same enzymes to generate pTU150 [*att*HK022 *bla* P<sub>lac</sub>::<sup>ss</sup>*dsbA-ccenvC-sfgfp*]. Finally, the <sup>cc</sup>*envC*-containing *Bam*HI-*Xho*I fragment from pTU150 was ligated with *Bam*HI-*Xho*I digested pTD68 [*bla* P<sub>T7</sub>::*H-SUMO-mcs*] (12) to generate pDY151.

#### pDY156

pDY156 [*att*HK022 *bla* P<sub>lac</sub>::*ftsEX-sfgfp*] was constructed as follows. *ftsEX* was amplified from MG1655 with the primers 5'-GTCATCTAGATTTTGCCCGAGAGGATTAACAATG-3' and 5'-GTCACTCGAGTTCAGGCGTAAAGTGGCGTAAATG-3'. The resulting fragment was digested with *Xba*I and *Xho*I and ligated with pTB311 [*att*HK022 *bla* P<sub>lac</sub>::<sup>ss</sup>*dsbA-amiB(23-445)-sfgfp*] (12) digested with the same enzymes.

#### pDY158-160

pDY158 [*att*λ *cat* P<sub>ara</sub>::*ftsE(K41M)*X] was made by site-directed mutagenesis of pTU188 [*att*λ *cat* P<sub>ara</sub>::*ftsEX*] using the QuickChange method (Stratagene) and the primer 5'-GATCAGCTTCAGGAGGGTACTCATCCCTGCGCCGGAATGACCGGT-3'.

pDY159 [*att*λ *cat* P<sub>ara</sub>::*ftsE(D162N)*X] was constructed by site-directed mutagenesis of pTU188 [*att*λ *cat* P<sub>ara</sub>::*ftsEX*] using the QuickChange method (Stratagene) and the primer 5'-GTCCAGGTTACCAGTCGGTTCGTTCCGAGCAGTACCGCGGGCTT-3'.



pDY160 [*attλ cat P<sub>ara</sub>::ftsE(E163Q)X*] was constructed by site-directed mutagenesis of pTU188 [*attλ cat P<sub>ara</sub>::ftsEX*] using the QuickChange method (Stratagene) and the primer 5'-GTCGTCCAGGTTACCAGTCGGTTGGTCCGCCAGCAGTACCGCGGG-3'.

#### pDY161-pDY165

pDY161 [*attHK022 bla P<sub>lac</sub>::ftsEX(152-161)-sfgfp*] was constructed as follows. To make the 10aa *ftsX* internal deletion *ftsEX(152-161)*, two overlap extension PCR fragments were amplified with the primers 5'-GTCATTCTAGATTTGCCCGAGAGGATTAACAATG-3' and 5'-GTTTTCTTCCAGCATATCCAGCTCACCCAGTGCGTCTTCACG-3' as well as 5'-CGTGAAGACGCACTGGGTGAGCTGGATATGCTGGAAGAAAAC-3' and 5'-GTCACTCGAGTTCAGGCGTAAAGTGGCGTAAATG-3' using pDY156 [*attHK022 bla P<sub>lac</sub>::ftsEX-sfgfp*] as the DNA template. The resulting PCR fragments were purified and used together as the final DNA template to amplify the *ftsEX(152-161)* fragment using the primers 5'-GTCATTCTAGATTTGCCCGAGAGGATTAACAATG-3' and 5'-GTCACTCGAGTTCAGGCGTAAAGTGGCGTAAATG-3'. The resulting fragment was digested with *Xba*I and *Xho*I and ligated with pTB311 [*attHK022 bla P<sub>lac</sub>::<sup>ss</sup>dsbA-amiB(23-445)-sfgfp*] (12) digested with the same enzymes.

#### pDY162

pDY162 [*attHK022 bla P<sub>lac</sub>::ftsEX(146-165)-sfgfp*] was constructed as follows. To make the 20aa *ftsX* internal deletion *ftsEX(146-165)*, two overlap extension PCR fragments were amplified with the primers 5'-GTCATTCTAGATTTGCCCGAGAGGATTAACAATG-3' and 5'-

TGCCGGAAGCGGGTTTTCTTCACGAGAAAGATAGTTCACTTT-3' as well as 5'-AAAGTGA ACTATCTTTCTCGTGAAGAAAACCCGCTTCCGGCA-3' and 5'-GTCACTCGAGTTCAGGCGTAAAGTGGCGTAAATG-3' using pDY156 [*attHK022 bla P<sub>lac</sub>::ftsEX-sfgfp*] as the DNA template. The resulting PCR fragments were purified and used together as the final DNA template to amplify the *ftsEX(146-165)* fragment using the primers 5'-GTCACTCTAGATTTGCCCGAGAGGATTAACAATG-3' and 5'-GTCACTCGAGTTCAGGCGTAAAGTGGCGTAAATG-3'. The resulting fragment was digested with *Xba*I and *Xho*I and ligated with pTB311 [*attHK022 bla P<sub>lac</sub>::<sup>ss</sup>dsbA-amiB(23-445)-sfgfp*] (12) digested with the same enzymes.

#### pDY163

pDY163 [*attHK022 bla P<sub>lac</sub>::ftsEX(137-176)-sfgfp*] was constructed as follows. To make the 40aa *ftsX* internal deletion *ftsEX(137-176)*, two overlap extension PCR fragments were amplified with the primers 5'-GTCACTCTAGATTTGCCCGAGAGGATTAACAATG-3' and 5'-CTGGAAATCGAGTTTCGGGATGCCTTGCTCGGCCTGCAACTG-3' as well as 5'-CAGTTGCAGGCCGAGCAAGGCATCCCGAAACTCGATTTCAG-3' and 5'-GTCACTCGAGTTCAGGCGTAAAGTGGCGTAAATG-3' using pDY156 [*attHK022 bla P<sub>lac</sub>::ftsEX-sfgfp*] as the DNA template. The resulting PCR fragments were purified and used together as the final DNA template to amplify the *ftsEX(137-176)* fragment using the primers 5'-GTCACTCTAGATTTGCCCGAGAGGATTAACAATG-3' and 5'-GTCACTCGAGTTCAGGCGTAAAGTGGCGTAAATG-3'. The resulting fragment was digested with *Xba*I and *Xho*I and ligated with pTB311 [*attHK022 bla P<sub>lac</sub>::<sup>ss</sup>dsbA-amiB(23-445)-sfgfp*] (12) digested with the same enzymes.

### pDY164

pDY164 [*attHK022 bla P<sub>lac</sub>::ftsEX(109-188)-sfgfp*] was constructed as follows. To make the 80aa *ftsX* internal deletion *ftsEX(109-188)*, two overlap extension PCR fragments were amplified with the primers 5'-GTCATCTAGATTTGCCCGAGAGGATTAACAATG-3' and 5'-GATACGATCACGCAGCGTATTTGACGGATAATACTGCGTCGC-3' as well as 5'-GCGACGCAGTATTATCCGTCAAATACGCTGCGTGATCGTATC-3' and 5'-GTCACTCGAGTTCAGGCGTAAAGTGGCGTAAATG-3' using pDY156 [*attHK022 bla P<sub>lac</sub>::ftsEX-sfgfp*] as the DNA template. The resulting PCR fragments were purified and used together as the final DNA template to amplify the *ftsEX(109-188)* fragment using the primers 5'-GTCATCTAGATTTGCCCGAGAGGATTAACAATG-3' and 5'-GTCACTCGAGTTCAGGCGTAAAGTGGCGTAAATG-3'. The resulting fragment was digested with *Xba*I and *Xho*I and ligated with pTB311 [*attHK022 bla P<sub>lac</sub>::<sup>ss</sup>dsbA-amiB(23-445)-sfgfp*] (12) digested with the same enzymes.

### pDY165

pDY165 [*attHK022 bla P<sub>lac</sub>::ftsEX(109-213)-sfgfp*] was constructed as follows. To make the 105aa *ftsX* internal deletion *ftsEX(109-213)*, two overlap extension PCR fragments were amplified with the primers 5'-GTCATCTAGATTTGCCCGAGAGGATTAACAATG-3' and 5'-CAGCCCGGTCAACGCCGCCAGTGACGGATAATACTGCGTCGC-3' as well as 5'-GCGACGCAGTATTATCCGTCACTGGCGGCGTTGACCGGGCTG-3' and 5'-GTCACTCGAGTTCAGGCGTAAAGTGGCGTAAATG-3' using pDY156 [*attHK022 bla P<sub>lac</sub>::ftsEX-sfgfp*] as the DNA template. The resulting PCR fragments were purified and used

together as the final DNA template to amplify the *ftsEX(109-213)* fragment using the primers 5'-GTCATCTAGATTTGCCCGAGAGGATTAACAATG-3' and 5'GTCACTCGAGTTCAGGCGTAAAGTGGCGTAAATG-3'. The resulting fragment was digested with *Xba*I and *Xho*I and ligated with pTB311 [*att*HK022 *bla* P<sub>lac</sub>::<sup>ss</sup>*dsbA-amiB(23-445)-sfgfp*] (12) digested with the same enzymes.

#### pDY166-pDY168

pDY166 [*att*HK022 *bla* P<sub>lac</sub>::*ftsE(K41M)X-sfgfp*] was constructed by amplifying *ftsE(K41M)X* with the primers 5'-GTCATCTAGATTTGCCCGAGAGGATTAACAATG-3' and 5'-GTCACTCGAGTTCAGGCGTAAAGTGGCGTAAATG-3' using pDY158 [*att*λ *cat* P<sub>ara</sub>::*ftsE(K41M)X*] as the DNA template. The resulting fragment was digested with *Xba*I and *Xho*I and ligated with pTB311 [*att*HK022 *bla* P<sub>lac</sub>::<sup>ss</sup>*dsbA-amiB(23-445)-sfgfp*] (12) digested with the same enzymes.

#### pDY167

pDY167 [*att*HK022 *bla* P<sub>lac</sub>::*ftsE(D162N)X-sfgfp*] was constructed by amplifying *ftsE(D162N)X* with the primers 5'-GTCATCTAGATTTGCCCGAGAGGATTAACAATG-3' and 5'-GTCACTCGAGTTCAGGCGTAAAGTGGCGTAAATG-3' using pDY159 [*att*λ *cat* P<sub>ara</sub>::*ftsE(D162N)X*] as the DNA template. The resulting fragment was digested with *Xba*I and *Xho*I and ligated with pTB311 [*att*HK022 *bla* P<sub>lac</sub>::<sup>ss</sup>*dsbA-amiB(23-445)-sfgfp*] (12) digested with the same enzymes.

#### pDY168

pDY168 [*att*HK022 *bla* P<sub>lac</sub>::*ftsE*(E163Q)*X-sfgfp*] was constructed by amplifying *ftsE*(E163Q)*X* with the primers 5'-GTCATCTAGATTTGCCCGAGAGGATTAACAATG-3' and 5'-GTCACTCGAGTTTCAGGCGTAAAGTGGCGTAAATG-3' using pDY160 [*att* $\lambda$  *cat* P<sub>ara</sub>::*ftsE*(E163Q)*X*] as the DNA template. The resulting fragment was digested with *Xba*I and *Xho*I and ligated with pTB311 [*att*HK022 *bla* P<sub>lac</sub>::<sup>ss</sup>*dsbA-amiB*(23-445)-*sfgfp*] (12) digested with the same enzymes.

### Recombineering

The  $\Delta$ *ftsEX*::Kan<sup>R</sup> allele was constructed by replacing the region between the 2nd codon of *ftsE* and the 7th codon from the stop codon of *ftsX* with a Kan<sup>R</sup> cassette as described previously (13, 14). The Kan<sup>R</sup> cassette was amplified from pKD13 (15) using the primers 5'-ACTTTATAGAGGCACTTTTTGCCCGAGAGGATTAACAATGATTCCGGGGATCCGTCGACC-3' and 5'-AGAGTATAACACGCTTTTATTATTTCAGGCGTAAAGTGGCGTGTAGGCTGGAGCTGCTTCG-3'. The resulting product was electroporated into strain TB10 as described previously (16), and the recombinants were selected at 30°C on an LB plate containing 1% NaCl and 20  $\mu$ g/ml kanamycin to generate the chromosomal deletion.

To generate a marker for the Z-ring, a *zapA-gfp* fusion was created at its native chromosomal locus by  $\lambda$  recombineering (14). *gfp-mut2* (17) coding sequence and a linked *cat* cassette flanked by *zapA* 3' end sequence and sequence downstream of *zapA* was amplified using pTB24 (8) as a template and the primers 5'-ACAAGGTCGCATCACCGAAAAAACTAACCAAAACTTTGAAGATCCCCCGCTGAATTCATG

-3' and 5'-

TTGTCTTCACGGTTACTCTACCACAGTAAACCGAAAAGTGGTGTAGGCTGGAGCTGCTTCG

-3'. The resulting fragment was used for recombineering in strain TB10 as described previously (16). The *zapA-gfp* fusion linked to the *cat* cassette was transferred between strains by P1-transduction.

### **Synthetic lethal screen**

The screen for mutants with a Slb phenotype was performed as previously described (5). Briefly, TU122/pTU110 [ $\Delta lacIZYA \Delta ponB/P_{lac}::ponB lacZ$ ] was mutagenized with the EzTn-Kan2 transposome (Epicenter) as previously described (16). Mutants were selected for Kan resistance at room temperature, yielding a library of 75,000 independent transposon insertions. This mutant library was plated on LB agar supplemented with 50  $\mu$ M IPTG and X-gal (40  $\mu$ g/ml) at 30°C and room temperature to identify mutants with a Slb phenotype. In addition to transposon the insertions in *ponA* and *lpoA* described previously (5), we also isolated mutants with insertions in *envC* (between codon 74 and 75) and *ftsX* (within codon 59).

### **Fluorescence microscopy**

Fluorescence microscopy was performed as described previously (7). See figure legends for specific growth conditions employed for each experiment. Cell fixation and membrane staining was performed as described previously (7).

### **Protein Purification, pull-up assays, and two-hybrid analysis**

FLEnvC and L<sup>yt</sup>EnvC were purified as described previously (12). <sup>CC</sup>EnvC was overexpressed and purified with a 6xHis-SUMO (H-SUMO) tag fused to its N-terminus. H-SUMO-<sup>CC</sup>EnvC was purified from BL21( $\lambda$ DE3)/pDY151 and a 10xHis-tagged version of Loop1FtsX [H-Loop1FtsX] was purified from BL21( $\lambda$ DE3)/pDY138. Overnight cultures were grown at 37°C in LB supplemented with ampicillin (50  $\mu$ g/ml) and glucose (0.2%). The cultures were diluted 1:100 into 0.1 L of LB supplemented with ampicillin (50  $\mu$ g/ml) and glucose (0.04%), and cells were grown at 30°C to an OD<sub>600</sub> of 0.81 and 0.86 respectively. IPTG was added to 1 mM and the cultures were grown for an additional 3 hrs at 30°C. Cells were harvested by centrifugation and the cell pellets were resuspended in 3 ml of buffer A (50 mM Tris-HCl pH 8.0, 300 mM NaCl, 10% glycerol) with 20 mM imidazole and stored at -80°C. Cells were thawed, disrupted by sonication, and cell debris was pelleted by centrifugation at 20,000 x g for 20 min at 4°C. The supernatants were passed through 0.2  $\mu$ M syringe filters and loaded onto ProPur IMAC mini spin columns (Nunc) equilibrated in buffer A with 20 mM imidazole. Columns were washed 3x using buffer A with 50 mM imidazole and eluted using buffer A with 300 mM imidazole. For H-SUMO-<sup>CC</sup>EnvC, the H-SUMO tag was cleaved with 6xHis-tagged SUMO protease (H-SP) as previously described (12). The cleavage reaction was passed through Ni-NTA resin (ProPur IMAC midi spin column) to remove free H-SUMO and H-SP, yielding a pure preparation of untagged <sup>CC</sup>EnvC. Amicon Centrifugal Filter Units (MWCO 10 kDa) were used to concentrate both protein preparations and exchange the buffer to buffer A without imidazole. Protein preparations were stored at -80°C in buffer A. The BACTH assay and Ni-NTA “pull-up” assays are described in the legend to **Figure 6**.

### **EnvC antisera and affinity purification of anti-EnvC antibodies**

Polyclonal rabbit antisera was raised against purified <sup>FL</sup>EnvC by Covance according to their standard protocol. The resulting anti-EnvC antibodies were affinity purified using <sup>FL</sup>EnvC coupled to AminoLink resin (Pierce) as described previously for SImA antibody purification (11).

### **Cell fractionation and immunoblotting**

Whole-cell extracts for **Fig. 4** were prepared as described previously (18). The protein concentration in each extract was determined using the non-interfering protein assay (Genotech) according to the manufacturer's instructions. Protein concentrations were normalized between extracts and 20, 10, or 5  $\mu$ g of total protein from each extract was separated on a 12% SDS-PAGE gel. Proteins were transferred to a PVDF membrane (Whatman) and the membrane was blocked with Rapid-Block (Genotech) for 5 minutes. The membrane was incubated with anti-EnvC antibodies (1:5000 in Rapid-Block) for 1 hour at room temperature. The membrane was washed three times with 25 ml TBST (10 mM Tris-HCl pH7.5, 100 mM NaCl, 0.1% Tween-20) for 10 minutes. Following the wash, the membrane was incubated with goat anti-rabbit antibodies conjugated with HRP (Rockland) (1:20,000 in Rapid-Block) for 1 hour at room temperature. Finally, the membrane was washed an additional four times as above and developed using the Pierce Super-Signal West-Pico reagents.

Chemiluminescence was detected using a BioRad Chemidoc system. Cell fractionations and immunoblotting for **Fig. 4B** were performed as described previously (19), except that 500 mM NaCl was added to the spheroplasts after they were formed and EnvC was detected as described above. NaCl addition was required to promote the complete release of EnvC to the periplasmic fraction in spheroplasts from FtsEX<sup>-</sup> cells.



## References

1. Miller JH (1972) *Experiments in Molecular Genetics* (Cold Spring Harbor Laboratory, Cold Spring Harbor, New York).
2. Guyer MS, Reed RR, Steitz JA, and Low KB (1981) Identification of a sex-factor-affinity site in *E. coli* as gamma delta. *Cold Spring Harb. Symp. Quant. Biol* 45:135-140.
3. Haldimann A, and Wanner BL (2001) Conditional-replication, integration, excision, and retrieval plasmid-host systems for gene structure-function studies of bacteria. *J Bacteriol* 183:6384-93.
4. Bernhardt TG, and de Boer PAJ (2005) SlmA, a nucleoid-associated, FtsZ binding protein required for blocking septal ring assembly over Chromosomes in *E. coli*. *Mol Cell* 18:555-64.
5. Paradis-Bleau C et al. (2010) Lipoprotein cofactors located in the outer membrane activate bacterial cell wall polymerases. *Cell* 143:1110-20.
6. Karimova G, Dautin N, and Ladant D (2005) Interaction network among *Escherichia coli* membrane proteins involved in cell division as revealed by bacterial two-hybrid analysis. *J Bacteriol* 187:2233-43.
7. Uehara T, Dinh T, and Bernhardt TG (2009) LytM-domain factors are required for daughter cell separation and rapid ampicillin-induced lysis in *Escherichia coli*. *J Bacteriol* 191:5094-5107.
8. Bendezú F, Hale C, Bernhardt T, and de Boer P (2009) RodZ (YfgA) is required for proper assembly of the MreB actin cytoskeleton and cell shape in *E. coli*. *EMBO J* 28:193-204.

9. Guzman LM, Belin D, Carson MJ, and Beckwith J (1995) Tight regulation, modulation, and high-level expression by vectors containing the arabinose PBAD promoter. *J Bacteriol* 177:4121-30.
10. Morlot C, Uehara T, Marquis KA, Bernhardt TG, and Rudner DZ (2010) A highly coordinated cell wall degradation machine governs spore morphogenesis in *Bacillus subtilis*. *Genes Dev* 24:411-22.
11. Cho H, McManus HR, Dove SL, and Bernhardt TG (2011) Nucleoid occlusion factor SlmA is a DNA-activated FtsZ polymerization antagonist. *Proc Natl Acad Sci U S A* 108:3773-8.
12. Uehara T, Parzych KR, Dinh T, and Bernhardt TG (2010) Daughter cell separation is controlled by cytokinetic ring-activated cell wall hydrolysis. *EMBO J* 29:1412-1422.
13. Baba T et al. (2006) Construction of *Escherichia coli* K-12 in-frame, single-gene knockout mutants: the Keio collection. *Mol Syst Biol* 2:2006.0008.
14. Yu D, Ellis HM, Lee EC, Jenkins NA, Copeland NG, and Court DL (2000) An efficient recombination system for chromosome engineering in *Escherichia coli*. *Proc Natl Acad Sci USA* 97:5978-83.
15. Datsenko KA, and Wanner BL (2000) One-step inactivation of chromosomal genes in *Escherichia coli* K-12 using PCR products. *Proc Natl Acad Sci USA* 97:6640-5.
16. Bernhardt TG, and de Boer PAJ (2004) Screening for synthetic lethal mutants in *Escherichia coli* and identification of EnvC (YibP) as a periplasmic septal ring factor with murein hydrolase activity. *Mol Microbiol* 52:1255-69.

17. Cormack BP, Valdivia RH, and Falkow S (1996) FACS-optimized mutants of the green fluorescent protein (GFP). *Gene* 173:33-8.
18. Hale CA, and de Boer PA (1999) Recruitment of ZipA to the septal ring of Escherichia coli is dependent on FtsZ and independent of FtsA. *J Bacteriol* 181:167-76.
19. Bernhardt TG, and de Boer PAJ (2003) The Escherichia coli amidase AmiC is a periplasmic septal ring component exported via the twin-arginine transport pathway. *Mol Microbiol* 48:1171-82.
20. Karimova G, Pidoux J, Ullmann A, and Ladant D (1998) A bacterial two-hybrid system based on a reconstituted signal transduction pathway. *Proc Natl Acad Sci USA* 95:5752-6.
21. Johnson JE, Lackner LL, Hale CA, and de Boer PAJ (2004) ZipA is required for targeting of DMinC/DicB, but not DMinC/MinD, complexes to septal ring assemblies in Escherichia coli. *J Bacteriol* 186:2418-29.
22. Pédelacq J-D, Cabantous S, Tran T, Terwilliger TC, and Waldo GS (2006) Engineering and characterization of a superfolder green fluorescent protein. *Nat Biotechnol* 24:79-88.
23. Shaner NC, Campbell RE, Steinbach PA, Giepmans BNG, Palmer AE, and Tsien RY (2004) Improved monomeric red, orange and yellow fluorescent proteins derived from *Discosoma* sp. red fluorescent protein. *Nat Biotechnol* 22:1567-72.
